# Supplementary material for: Socioeconomic inequality and mortality - a regional Danish cohort study
Source: Springer Nature journal article supplement (doi:10.1186/s12889-015-1813-3), 2015-05-13
Supplement: MOESM3 [file 9749454]

**Additional file, Figure 3a, Hazard ratios and 95% confidence intervals for educational status estimated by Cox regression models on the full study sample - using all available data in the different models**

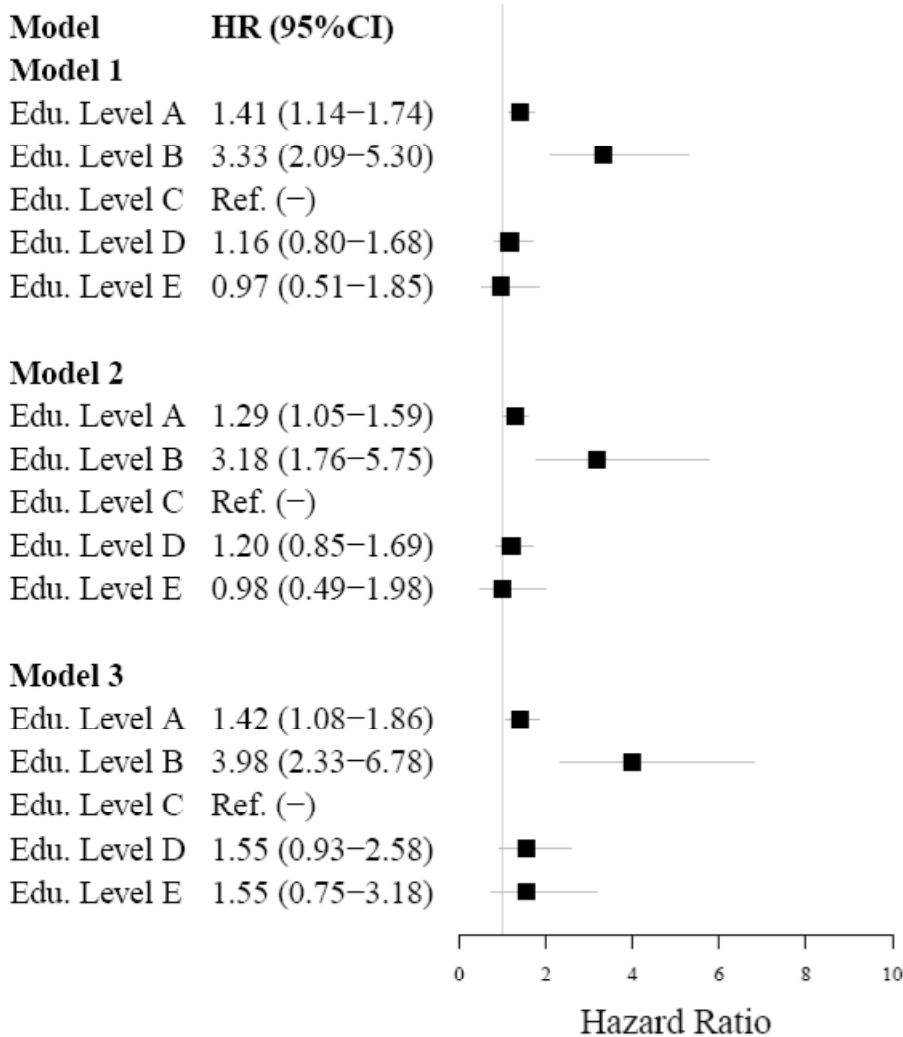

Educational level C (Vocational upper secondary education) used as reference. Model 1 was adjusted for age and gender (n=10,106). Model 2 was further adjusted for subjective and objective health (n=10,106). Model 3 was additionally adjusted for behavioural, psychological, material and social determinants (n=8,837), missing data occur because of non-response.

Educational level A: Early childhood education, primary education and lower secondary education

Educational level B: General upper secondary education, high school programmes

Educational level C: Vocational upper secondary education, vocational training and education

Educational level D: Short or medium length higher education, first-cycle programmes tertiary education, bachelor or equivalent

Educational level E: Long higher education, second-cycle programmes, Master’s or equivalent, or Third-cycle programmes Doctoral, PhD programmes or equivalent
